1  
2  
3  
4  
5  
6  
7  
8  
9  
10  
11  
12  
13  
14  
15  
16  
17  
18  
19  
20  
21  
22  
23  
24  
25  
26  
27

# Precise prediction of antibiotic resistance in *Escherichia coli* from full genome sequences

Danesh Moradigaravand<sup>1</sup>, Martin Palm<sup>2,3</sup>, Anne Farewell<sup>2,3</sup>, Ville Mustonen<sup>4</sup>, Jonas Warringer<sup>2,3</sup>, and Leopold Parts<sup>1,5</sup>

1-Wellcome Sanger Institute, Wellcome Genome Campus, Hinxton, Cambridgeshire CB10 1SA, United Kingdom

2- Department for Chemistry and Molecular Biology, University of Gothenburg 405 30, Sweden

3- Centre for Antibiotic Resistance Research at the University of Gothenburg 405 30, Sweden

4- Organismal and Evolutionary Biology Research Programme, Department of Computer Science, Institute of Biotechnology, University of Helsinki, Finland

5-Department of Computer Science, University of Tartu, J. Liivi 2, 50409, Estonia

## Corresponding authors:

Danesh Moradigaravand: [dm16@sanger.ac.uk](mailto:dm16@sanger.ac.uk)

Leopold Parts: [leopold.parts@sanger.ac.uk](mailto:leopold.parts@sanger.ac.uk)

28 **Abstract**

29

30 The emergence of microbial antibiotic resistance is a global health threat. In clinical settings, the  
31 key to controlling spread of resistant strains is accurate and rapid detection. As traditional  
32 culture-based methods are time consuming, genetic approaches have recently been developed  
33 for this task. The diagnosis is typically made by measuring a few known determinants previously  
34 identified from whole genome sequencing, and thus is restricted to existing information on  
35 biological mechanisms. To overcome this limitation, we employed machine learning models to  
36 predict resistance to 11 compounds across four classes of antibiotics from existing and novel  
37 whole genome sequences of 1936 *E. coli* strains. We considered a range of methods, and  
38 examined population structure, isolation year, gene content, and polymorphism information as  
39 predictors. Gradient boosted decision trees consistently outperformed alternative models with  
40 an average F1 score of 0.88 on held-out data (range 0.66-0.96). While the best models most  
41 frequently employed all inputs, an average F1 score of 0.73 could be obtained using population  
42 structure information alone. Single nucleotide variation data were less useful, and failed to  
43 improve prediction for ten out of 11 antibiotics. These results demonstrate that antibiotic  
44 resistance in *E. coli* can be accurately predicted from whole genome sequences without *a priori*  
45 knowledge of mechanisms, and that both genomic and epidemiological data are informative. This  
46 paves way to integrating machine learning approaches into diagnostic tools in the clinic.

47

48

49

## 50 **Summary**

51 One of the major health threats of 21st century is emergence of antibiotic resistance. To manage  
52 its economic impact, efforts are made to develop novel diagnostic tools that rapidly detect  
53 resistant strains in clinical settings. In our study, we employed a range machine learning tools to  
54 predict antibiotic resistance from whole genome sequencing data for *E. coli*. We used the  
55 presence or absence of genes, population structure and isolation year of isolates as predictors,  
56 and could attain average precision of 0.93 and recall of 0.83, without prior knowledge about the  
57 causal mechanisms. These results demonstrate the potential application of machine learning  
58 methods as a diagnostic tool in healthcare settings.

59

60

## 61 **Introduction**

62 Antibiotic resistance has turned into an acute global threat. The rise of bacterial strains resistant  
63 to multiple antibiotics is expected to dramatically limit treatment effectiveness [1], leading to  
64 potentially incurable outbreaks. In addition to new drug development efforts, there is an urgent  
65 need for preclinical tools that are capable of effective and rapid detection of resistance [2, 3], as  
66 culture-based laboratory diagnostics test are usually time consuming and costly [3].

67

68 To accelerate the diagnosis, genetic tests have been devised to identify known resistance genes.  
69 The increasingly affordable and available whole genome sequencing data from clinical strains has  
70 helped to robustly identify antibiotic resistance determinants, and to curate them in dedicated  
71 databases [4, 5]. Given sequence from a new strain, computational methods can then look up  
72 known causal genes in these resources [5, 6]. Whilst such rule-based models are highly accurate  
73 for some common pathogens with well-characterized resistance mechanisms (e.g.  
74 *Mycobacterium tuberculosis* and *Staphylococcus aureus*), they cannot be employed to detect  
75 resistance caused by unknown mechanisms in other major pathogenic strains, and require  
76 constant curation to remain effective.

77

78 Prediction approaches based on machine learning have the potential to overcome these  
79 restrictions of rule-based tests. As general-purpose methods, they are agnostic to the causal  
80 mechanisms, and learn useful features directly from data [7-9]. Already, decision tree based  
81 models have proven valuable for predicting resistance and pathogen invasiveness from genomic  
82 sequences [10-14]. However, these studies were limited in both the genetic features used and  
83 the methods applied. In particular, both population structure and accessory genome content  
84 could contain predictive information, as resistance determinants may be transferred horizontally  
85 from other strains, or inherited vertically from an ancestor [2]. Further, the powerful deep  
86 learning methods that can utilize complex features interactions were not examined.

87  
88 Here, we systematically evaluate the performance of machine learning algorithms for predicting  
89 antibiotic resistance from *E. coli* whole genome sequence data. We present genome sequences  
90 and resistance measurements of 255 new isolates and consider them together with published  
91 data from recent large-scale studies, as well as simulated datasets. We test whether prediction  
92 accuracy improves with including temporal data, population structure, and accessory genome  
93 content, and assess how a range of population parameters, such as mutation and recombination  
94 rates, influence predictions.

## 95 **Methods**

### 96 *Isolates*

97 We used 1681 strains from four large-scale clinical and environmental *E. coli* collections, with  
98 available data on the year of isolation, drug susceptibility phenotypes, and whole genome  
99 sequence [15, 16]. Furthermore, we collected 255 strains from a range of ecological niches:  
100 hospital sewage and water treatment plant from Sweden (Carl-Fredrik Flach); human clinical  
101 isolates isolated in Pakistan, Syria, Sweden and USA (Culture Collection University of  
102 Gothenburg); a collection of strains producing extended-spectrum  $\beta$ -lactamases isolated in  
103 Sweden (Christina Åhrén) and environmental samples from Belgium (Jan Michiels).

104

### 105 *Antimicrobial susceptibility testing*

106 Antimicrobials tested included beta-lactams (penicillin: ampicillin (AMP, 6 $\mu$ g/ml);  
107 cephalosporins: cefuroxime (CXM, 8 $\mu$ g/ml), cefotaxime (CTX, 4 $\mu$ g/ml), cephalothin (CET,  
108 20 $\mu$ g/ml) and ceftazidime (CTZ, 0.25 $\mu$ g/ml)), aminoglycosides (gentamicin (GEN, 4 $\mu$ g/ml) and  
109 tobramycin (TBM, 8 $\mu$ g/ml)), and fluoroquinolones (ciprofloxacin (CIP, 1 $\mu$ g/ml)). Concentrations  
110 used were determined by performing a 2-fold serial dilution, starting from twice the  
111 concentrations listed by the European Committee on Antimicrobial Susceptibility Testing  
112 (EUCAST) on 25/01/2017, until no growth was observed after 16 hours for the common lab strain  
113 BW25113 [17] used as a control in the experiments.

114

### 115 *Sequencing data generation*

116

117 We extracted DNA with the Bacterial Genomic DNA Isolation 96-Well Kit (Norgen Biotek) as  
118 detailed in the manufacturer's instructions. Libraries were prepared with standard Illumina DNA  
119 sequencing library preparation protocols, and sequenced on Illumina HiSeq X with 150 bp paired  
120 end reads, multiplexing 384 samples per lane, and achieving average depth of coverage of 40-  
121 fold. We used Kraken, which accurately assigns taxonomic labels to the short DNA reads [18], to  
122 confirm the presence of *E. coli* reads in the pool. The raw sequences for the sequenced data in  
123 this study have been deposited in the European Nucleotide Archive (ENA) under the accession

124 numbers described in Supplemental Table S1. The assembled data is available in the repository  
125 ([www.github.com/DaneshMoradigaravand/PanPred](http://www.github.com/DaneshMoradigaravand/PanPred)).

126

### 127 *Pan-genome determination*

128

129 Paired-end reads for the isolates sequenced both here and previously were assembled with  
130 Velvet [19] and put through an improvement pipeline [20]. In order to reconstruct the pan-  
131 genome, we used the output assemblies and annotated these with Prokka [21]. The annotated  
132 assemblies produced by Prokka were then used as input for Roary [22] to build the pan-genomes  
133 with the identity cut-off of 95%. Roary produced a matrix for the presence and absence of  
134 accessory genes. The variant sites (SNPs) in the core genome alignment were extracted with an  
135 in-house `snp_sites` tool ([www.github.com/sanger-pathogens/snp-sites](http://www.github.com/sanger-pathogens/snp-sites)). To visualize the  
136 phylogenetic tree with the associated metadata, we used iTOL [23].

137

138

### 139 *Population structure calculation*

140 We mapped the short reads to the reference EC958 genome sequence [24] as detailed in [25],  
141 and calculated the pairwise SNP distance (number of differing sites) for the core genome  
142 alignment of strains with functions in the `ape` package [26]. We identified clusters within the  
143 population using a distance-based method in the `adegenet` package [27]. We clustered  
144 sequences using the sequence distance metric with the `adegenet` package for all possible  
145 number of clusters from 1 to number of strains. Based on these clusterings, we constructed the  
146 population structure matrix  $S$ , where  $s_{ij} = k$  if strain  $i$  belongs to cluster  $k$  in the clustering with at  
147 most  $j$  clusters.

148

### 149 *Simulated datasets*

150 To evaluate the performance of prediction tools, we simulated pan-genomes with Scoary [28].  
151 The simulation process begins with a single genome with 3000 core and 6000 accessory genes  
152 that undergoes duplication and gene loss/gain in every generation, and continues until a desired  
153 number of genomes is reached; we tested population sizes of 130, 260, 650 and 1300. We  
154 examined penetrances, defined as the probability of acquisition/loss of the resistance phenotype

155 simultaneously to the acquisition/loss of the causal resistance gene, of 0.5, 0.6, 0.7, 0.8, 0.9 and  
156 1.

157

### 158 *Feature calculation*

159 We examined different predictors as inputs: 1) matrix of the presence-absence of accessory  
160 genomes within the pan-genome (G), where  $g_{ij}$  is 1 if gene  $i$  is present in strain  $j$ , and 0 otherwise;  
161 2) matrix of population structure inferred from core-genome (S) defined above, and one-hot  
162 encoded 3) matrix of SNP sites (SNP), where  $SNP_{ij} = 0$  if strain  $j$  carries the ancestral allele at site  
163  $i$ , and 1, 2, 3, 4, 5 if it contained A, T, C, G nucleotide or missing information, respectively; and 4)  
164 matrix of years of isolation (Y). We standardized each feature to have 0 mean and unit variance.  
165 Genes, strain clusters, and SNPs with identical indicator pattern were collapsed, so there are no  
166 duplicate rows in the G, S, or SNP matrices.

167

### 168 *Resistance prediction*

169 We performed prediction using various combinations of input predictor matrices using resistance  
170 indicator as the output. We used 70% of the data for training the various models, and used the  
171 F1 score (harmonic mean of precision and recall) for resistance classification to evaluate them  
172 model on the remaining 30%. Four different models were used along with a baseline:

173 - Logistic regression with  $L_2$  regularization. We employed the “LogisticRegression” function in the  
174 Scikit-learn python package ([www.scikit-learn.org](http://www.scikit-learn.org)) [36], with the “lbfgs” solver, and varied the  
175 regularization parameter strength from 0 to 1 with step size 0.01.

176 - Random forest classifier. We employed the “RandomForestClassifier” function in Scikit-learn  
177 and varied the number of trees in the forest (100, 300 and 600). When searching for the best  
178 split, we used both square root and binary logarithm selection of the number of features. We  
179 used bootstrap samples for building trees, out-of-bag samples to estimate accuracy, Gini impurity  
180 as the criterion for the information gain, and trained until all leaves were pure.

181 - Gradient boosted decision trees. We used the “GradientBoostingClassifier” implementation in  
182 Scikit-learn, with learning rate 0.1, and 100, 300 and 600 boosting stages. We used the same  
183 methods as for the random forests for choosing the number of features when selecting for the

184 best split, and employed the deviance loss function. We limited the maximum depth of trees to  
185 3, and the minimum number of samples required to split an internal or leaf node to 2 and 1,  
186 respectively. In order to assess the robustness of feature importance analysis, we repeated the  
187 optimization with 50 random seeds. As a measure for feature importance, we counted the  
188 number of times a feature used in optimization, as well as the average feature rank and  
189 importance across multiple replica.

190 - Deep neural networks. We employed the keras library in python ([www.keras.io](http://www.keras.io)) to build fully  
191 connected deep neural networks. We tested two and four layer networks, with two output nodes  
192 corresponding to resistant and susceptible states, and 200, 300 and 400 nodes in each internal  
193 layer. We used Adam to train for 20 epochs, with batch size of 128, learning rate of 0.1, drop-out  
194 of 0, 0.1 or 0.3, and stopping when the validation set performance decreased. Due to the small  
195 training dataset size compared to the number of features, for ~50% of runs the loss in the  
196 validation did not decrease by the end of training the network. We randomly partitioned the data  
197 into training (56%), validation (14%) and test (30%) sets, and trained models with different  
198 parameters on the training set, evaluated quality on the validation set, and final performance on  
199 the test set.

200 - Rule-based baseline. We compared our results with a rule-based method based on the  
201 detection of known resistance genes. To this end, we employed srst2 [29] and mapped short  
202 reads to the ResFinder database of known resistance genes in the srst2 package, using the cut-  
203 off of 60% for the length coverage.

204

205



## 206 **Results**

207 Our data comprise 1936 samples that have been full genome sequenced, and phenotyped for  
208 resistance of 11 antibiotics. Resistance was distributed both within specific clades as well as  
209 emerging sporadically on divergent lineages (Figure S1), with an average frequency of 0.35 per  
210 drug (range: 0.15-0.63). This pattern is suggestive of both vertical and horizontal spread of  
211 resistance determinants. Genome sequences were processed to give gene and polymorphism  
212 presence information (1,390 core genes present in >99% of lineages, 90,261 genes present in one  
213 than one lineage, 1,432,145 variable sites in core genes), and 1,071 population structure  
214 features.

215  
216 We used these predictors to test the ability of four machine learning models - logistic regression,  
217 random forests, gradient boosted decision trees, and deep neural networks - to predict antibiotic  
218 resistance. We varied model hyperparameters, as well as input data types, to establish the best-  
219 in-class predictors according to the F1 score for resistance (Methods). Gradient boosted decision  
220 trees performed best for predicting resistance of 11/11, and susceptibility of 10/11 drugs (Figure  
221 1), with average precision of 0.93 and recall of 0.83 (Figure S2). Perhaps surprisingly, deep  
222 learning models that account for complex non-linear relations amongst features did not provide  
223 substantial improvement over the simpler logistic regression models, or random forests (Figure  
224 1).

225  
226 Knowledge of what features that aid prediction will help prioritize data collection and diagnostic  
227 efforts. The gene presence and absence predictor (G) was used in all the best predictive models  
228 for each of the considered methods (Figure 1; lower panel). This is not surprising, given multiple  
229 known resistance mechanisms driven by accessory gene content, e.g. for beta-lactams and  
230 aminoglycosides. Population structure information (S) and year of isolation data (Y) were also  
231 frequently beneficial (used in 26 and 34 out of 44 best models, respectively). Adding gene  
232 presence to population structure features improved F1 score by 0.12 on average (Figure S3). In  
233 contrast, once gene presence had been accounted for, there was limited performance gain when  
234 including population structure features (Figure S3). This suggests that accessory gene content

235 already contains information about population structure, which reflects the pattern of  
236 polymorphisms in the core genome. Indeed, core genome distance and accessory gene difference  
237 matrices are not independent ( $p < 0.01$ , Mantel test), which is likely explained by accessory genes  
238 acquired by clade ancestors, followed by limited turnover.

239  
240 Next, we asked which individual features are most frequently utilized. We measured feature  
241 importance as the number of times it was used for gradient boosted decision trees, the best  
242 performing method, across 50 random fitting replicates on fixed training date (Figure S4). Overall,  
243 only an average 3% of input features (653 of 17198) were used at all in prediction across different  
244 drugs. In general, known resistance genes were identified as the most important, and were most  
245 frequently used features for predicting resistance to beta-lactams and aminoglycosides, e.g.  
246 *blaOXA-2*, *blaTEM-1*, *blaCTX-M-15*, and extra copies of *ampC* and *phnP* efflux pump genes  
247 (Supplemental Table S2). For example, the known beta-lactamase *bla-CTX-M* gene ranked first in  
248 all models for predicting resistance to beta-lactam ceftazidime, which followed by some genes  
249 with unknown function and *ampC* (Figure S4A). Perhaps surprisingly, we found that while the  
250 year of isolation was a dispensable feature for nearly all drugs, it was deemed important for  
251 ampicillin resistance prediction (Figure S4B). This was explained by the temporal distribution of  
252 the data, where all the strains collected in 2015 were resistant. These findings demonstrate that  
253 although known resistance genes were most predictive, other features, i.e. population structure  
254 and year of isolation, may be reproducibly used for prediction as well (Figure S4B). Nevertheless,  
255 it is clear that the inclusion of some features, such as collection year, reflects bias in the training  
256 data rather than biological importance.

257  
258 Population structure information was often selected for use in the best performing models, and  
259 therefore useful for prediction (Figure 1). Indeed, training only on population structure produced  
260 an average F1 score of 0.73 (range: 0.23-0.92), and this performance could not be achieved with  
261 randomized phenotypes (Figure S5). Population structure features capture both recently  
262 diverged and deep clades (Figure 2A), and features included in the models were not limited to a  
263 single lineage or common depth (for example Figure 2B). As an example, the CL136 feature, which

264 is the most important identified feature, distinguishes clusters by positing a maximum pairwise  
265 sequence distance between isolates of 136 nucleotides. Cluster membership at this level of  
266 similarity informs of resistance, as 85% of clusters with at least two strains contained either only  
267 resistant or only susceptible strains (Figure 2C). In these cases, resistance status of an ancestral  
268 strain of the clades was likely retained in descendants and did not change due to horizontal gene  
269 transfer, mutation, or sporadic gene loss. Altogether, the results show that predictive models can  
270 utilize genetic relatedness and population structure for predicting resistance, as has been  
271 observed in traditional eukaryotic genetics [8].

272  
273 While the major mechanism for evolving antibiotic resistance is gene acquisition, mutations on  
274 chromosomes may also play a role, and therefore aid prediction. We thus next included single  
275 nucleotide polymorphism (SNP) data for gradient boosted decision trees, re-fitted  
276 hyperparameters, and evaluated on held out data. Predictive performance improved for four of  
277 the 11 antibiotics (Figure S3B). As anticipated, the largest improvement of 7.6% occurred for  
278 ciprofloxacin, resistance against which is known to involve chromosomal mutations [30, 31].  
279 Accordingly, the three most important identified features were variants in chromosomal  
280 quinolone-resistance-determining regions of the genes encoding DNA gyrase (*gyrA*), and  
281 topoisomerase IV *parC*. For other antibiotics, the addition of SNP data either did not greatly  
282 improve or worsened prediction performance (Figure S3B, Discussion).

283  
284 A possible limitation for applying machine learning methods to detect antibiotic resistance is the  
285 unavoidably small number of samples (1,936 in this study) compared to the number of features  
286 (~18,270 in this study after collapsing the fully correlated features). To better understand how  
287 this imbalance impacts performance, we simulated data from different sample sizes using a range  
288 of penetrances for a single resistance determinant. As anticipated, the performance of gradient  
289 boosted decision trees dropped when the penetrance of the resistance determinant decreased  
290 (Figure S6). However, there was no reduction in F1 score upon decreasing the population size,  
291 even when using only 130 strains. Overall, these findings suggest that the large number of

292 features relative to sample size does not impact model performance for high frequency causal  
293 genes.

294

295 The current clinical standards employ rule-based models to predict resistance from a small  
296 number of known determinants. We used *srst2* [29] to identify known resistance genes for  
297 cephalosporins, penicillins, aminoglycosides and trimethoprim (Table 2), and used this  
298 information to better understand prediction errors. The best model's false positive resistance  
299 calls for different antibiotics contained 2 or 33 isolates that carried known resistance genes (beta-  
300 lactams, aminoglycoside modifying enzymes and *dfp* genes), but were annotated as susceptible.  
301 Manual inspection confirmed that all of these genes were fully covered by sequence data, and  
302 almost identical to the known resistance genes. Moreover, for different antibiotics, one to nine  
303 false negative resistance calls (36 total) did not contain a known causal determinant. Similarly,  
304 two to nine resistant strains (51 total) were correctly marked as resistant by our model, but  
305 contained no known resistance gene (Table 2). These discrepancies may be explained by either  
306 resistance testing error, genomic sequence quality, or unknown mechanisms for resistance. As  
307 neither approach was perfect, predictive models in combination with rule-based methods may  
308 help identify cases that necessitate further analysis or repeating the susceptibility tests,  
309 ultimately leading to improved diagnostics and novel mechanisms.

310

311

## 312 Discussion

313 We examined the ability of four different machine learning methods to predict antibiotic  
314 resistance from genomic information in *E.coli*, without making assumptions about the underlying  
315 genetic mechanisms. Our tests revealed that accessory genome data is needed for high accuracy  
316 in general, but that population structure information can also aid prediction.

317  
318 Our input dataset was diverse. The collection comprised seven sequence types and strains from  
319 15 consecutive years across a range of geographical locations. The majority of isolates (1509 of  
320 1936 samples) were from a nationwide study across hospitals in the United Kingdom and Ireland  
321 [15], and associated with bacteremia. This geographical bias is not expected to affect the  
322 performance of the model on a new clinical dataset, since *E. coli* sequence types (e.g. ST131 clone  
323 [32]) are circulated across hospitals worldwide. However, as isolates from potential reservoirs,  
324 including hospital sewage and wastewater treatment plants, were underrepresented in training  
325 data (99 of 1936 samples), we cannot conclusively assess how well the trained models detect  
326 resistance in samples from these sources. More data are needed to develop robust models across  
327 the entire species range, especially if resistance mechanisms differ in the various niches.

328  
329 The phenotype data was binary - each isolate was deemed either resistant or not to a compound.  
330 It is clear that this is an oversimplification of reality, as substantial variation hides within both  
331 categories. As the resistance phenotype is directly exposed to selection, it will influence how  
332 quickly it spreads within and between patients, as well as in bacterial populations at large. To  
333 predict treatment outcomes, correctly design interventions and allocate societal resources, it will  
334 therefore be important to be able to accurately predict resistance quantitatively as well. This  
335 requires non-binary resistance data, acquired at high accuracy and throughput.

336  
337 Our findings confirm the utility of ensemble methods, and in particular boosting models, for  
338 predicting antibiotic resistance. While deep learning models are able to capture higher order  
339 interactions between features, and therefore often outperform simpler alternatives [37], they  
340 did not provide additional advantage here. Tree-based methods are often used as an

341 intermediate between simple models that treat features independently, like logistic regression,  
342 and more complex, but poorly interpretable models. Indeed, random forest readouts can be  
343 analysed for feature importance as we have done here, and even detecting genetic interactions  
344 (e.g. [33, 34]). However, as for association methods [28, 35], the true impact of genetic features  
345 is confounded by their phylogenetic distribution and population structure. Therefore,  
346 approaches to distinguish causal resistance genes from all correlated markers require additional  
347 experimental study.

348

349 Recent reports have confirmed the strength of tree-based methods for predicting clinical  
350 attributes. For example, Wheeler *et al.* used random forests to predict invasiveness of *Salmonella*  
351 *enterica* lineages [14]. In another study, a tree ensemble was trained with boosting to predict  
352 the minimum inhibitory concentration from DNA k-mers for a large-scale *Klebsiella pneumoniae*  
353 panel [10], but the value of using core genome compared to accessory genes was not  
354 investigated. In general, including variant data or k-mers in the model greatly increases the  
355 number of features. However, adding the ~1 million additional single nucleotide features to  
356 ~20,000 others did not improve the results for most drugs in our dataset. This suggests that only  
357 pan-genome data could be used in early screenings for resistance, and including nucleotide-level  
358 information will be more beneficial in a limited form, once causality is established for a broader  
359 range of SNPs.

360

361 Many factors can affect the performance of a predictive model. For instance, we noted that  
362 amongst the antibiotics, the results were worst for amoxicillin-clavulanate. This might be due to  
363 a beta-lactamase inhibitor, which dominates the impact of a resistance gene, causing  
364 susceptibility, and resulting in a wrong prediction. The genome-based prediction also cannot  
365 account for non-genomic resistance mechanisms, such as high expression level of resistance  
366 genes. Consequently, future models should assess the value of even broader data for accurate  
367 prediction, ranging from transcriptome and proteome to other clinical and epidemiological data,  
368 such as cross-resistance and history of antibiotic therapy. Integrating these information sources

369 from large isolate panels into a single predictive framework will lead to a rational basis for  
370 decision-making in public health to reduce cost of diagnoses and treatments.

## 371 References

372

- 373 1. Holmes AH, Moore LS, Sundsfjord A, Steinbakk M, Regmi S, Karkey A, et al.  
374 Understanding the mechanisms and drivers of antimicrobial resistance. *Lancet*.  
375 2016;387(10014):176-87. Epub 2015/11/26. doi: 10.1016/S0140-6736(15)00473-0. PubMed  
376 PMID: 26603922.
- 377 2. Sommer MOA, Munck C, Toft-Kehler RV, Andersson DI. Prediction of antibiotic  
378 resistance: time for a new preclinical paradigm? *Nat Rev Microbiol*. 2017;15(11):689-96. Epub  
379 2017/08/02. doi: 10.1038/nrmicro.2017.75. PubMed PMID: 28757648.
- 380 3. Burnham CD, Leeds J, Nordmann P, O'Grady J, Patel J. Diagnosing antimicrobial  
381 resistance. *Nat Rev Microbiol*. 2017;15(11):697-703. Epub 2017/10/13. doi:  
382 10.1038/nrmicro.2017.103. PubMed PMID: 29021600.
- 383 4. McArthur AG, Waglechner N, Nizam F, Yan A, Azad MA, Baylay AJ, et al. The  
384 comprehensive antibiotic resistance database. *Antimicrob Agents Chemother*. 2013;57(7):3348-  
385 57. Epub 2013/05/08. doi: 10.1128/AAC.00419-13. PubMed PMID: 23650175; PubMed Central  
386 PMCID: PMC3697360.
- 387 5. Zankari E, Hasman H, Cosentino S, Vestergaard M, Rasmussen S, Lund O, et al.  
388 Identification of acquired antimicrobial resistance genes. *J Antimicrob Chemother*.  
389 2012;67(11):2640-4. doi: 10.1093/jac/dks261. PubMed PMID: 22782487; PubMed Central  
390 PMCID: PMC3468078.
- 391 6. Stoesser N, Batty EM, Eyre DW, Morgan M, Wyllie DH, Del Ojo Elias C, et al. Predicting  
392 antimicrobial susceptibilities for *Escherichia coli* and *Klebsiella pneumoniae* isolates using whole  
393 genomic sequence data. *J Antimicrob Chemother*. 2013;68(10):2234-44. Epub 2013/06/01. doi:  
394 10.1093/jac/dkt180. PubMed PMID: 23722448; PubMed Central PMCID: PMC3772739.
- 395 7. Martens K, Hallin J, Warringer J, Liti G, Parts L. Predicting quantitative traits from  
396 genome and phenome with near perfect accuracy. *Nat Commun*. 2016;7:11512. Epub  
397 2016/05/11. doi: 10.1038/ncomms11512. PubMed PMID: 27160605; PubMed Central PMCID:  
398 PMC4866306.
- 399 8. Hallin J, Martens K, Young AI, Zackrisson M, Salinas F, Parts L, et al. Powerful  
400 decomposition of complex traits in a diploid model. *Nat Commun*. 2016;7:13311. Epub  
401 2016/11/03. doi: 10.1038/ncomms13311. PubMed PMID: 27804950; PubMed Central PMCID:  
402 PMC5097135.
- 403 9. Galardini M, Koumoutsi A, Herrera-Dominguez L, Cordero Varela JA, Telzerow A, Wagih  
404 O, et al. Phenotype inference in an *Escherichia coli* strain panel. *Elife*. 2017;6. Epub 2017/12/28.  
405 doi: 10.7554/eLife.31035. PubMed PMID: 29280730; PubMed Central PMCID:  
406 PMC5745082.
- 407 10. Nguyen M, Brettin T, Long SW, Musser JM, Olsen RJ, Olson R, et al. Developing an in  
408 silico minimum inhibitory concentration panel test for *Klebsiella pneumoniae*. *Sci Rep*.  
409 2018;8(1):421. Epub 2018/01/13. doi: 10.1038/s41598-017-18972-w. PubMed PMID:  
410 29323230; PubMed Central PMCID: PMC5765115.
- 411 11. Pesesky MW, Hussain T, Wallace M, Patel S, Andleeb S, Burnham CD, et al. Evaluation of  
412 Machine Learning and Rules-Based Approaches for Predicting Antimicrobial Resistance Profiles  
413 in Gram-negative Bacilli from Whole Genome Sequence Data. *Front Microbiol*. 2016;7:1887.



- 414 Epub 2016/12/15. doi: 10.3389/fmicb.2016.01887. PubMed PMID: 27965630; PubMed Central  
415 PMCID: PMC5124574.
- 416 12. Antonopoulos DA, Assaf R, Aziz RK, Brettin T, Bun C, Conrad N, et al. PATRIC as a unique  
417 resource for studying antimicrobial resistance. *Brief Bioinform.* 2017. Epub 2017/10/03. doi:  
418 10.1093/bib/bbx083. PubMed PMID: 28968762.
- 419 13. Rahman SF, Olm MR, Morowitz MJ, Banfield JF. Machine Learning Leveraging Genomes  
420 from Metagenomes Identifies Influential Antibiotic Resistance Genes in the Infant Gut  
421 Microbiome. *mSystems.* 2018;3(1). Epub 2018/01/24. doi: 10.1128/mSystems.00123-17.  
422 PubMed PMID: 29359195; PubMed Central PMCID: PMC5758725.
- 423 14. Wheeler NE, Gardner PP, Barquist L. Machine learning identifies signatures of host  
424 adaptation in the bacterial pathogen *Salmonella enterica*. *PLoS Genet.* 2018;14(5):e1007333.  
425 Epub 2018/05/09. doi: 10.1371/journal.pgen.1007333. PubMed PMID: 29738521.
- 426 15. Kallonen T, Brodrick HJ, Harris SR, Corander J, Brown NM, Martin V, et al. Systematic  
427 longitudinal survey of invasive *Escherichia coli* in England demonstrates a stable population  
428 structure only transiently disturbed by the emergence of ST131. *Genome Res.* 2017. doi:  
429 10.1101/gr.216606.116. PubMed PMID: 28720578; PubMed Central PMCID: PMC5538559.
- 430 16. Runcharoen C, Raven KE, Reuter S, Kallonen T, Paksanont S, Thammachote J, et al.  
431 Whole genome sequencing of ESBL-producing *Escherichia coli* isolated from patients, farm  
432 waste and canals in Thailand. *Genome Med.* 2017;9(1):81. doi: 10.1186/s13073-017-0471-8.  
433 PubMed PMID: 28877757; PubMed Central PMCID: PMC5588602.
- 434 17. Datsenko KA, Wanner BL. One-step inactivation of chromosomal genes in *Escherichia*  
435 *coli* K-12 using PCR products. *Proc Natl Acad Sci U S A.* 2000;97(12):6640-5. Epub 2000/06/01.  
436 doi: 10.1073/pnas.120163297. PubMed PMID: 10829079; PubMed Central PMCID:  
437 PMC518686.
- 438 18. Wood DE, Salzberg SL. Kraken: ultrafast metagenomic sequence classification using  
439 exact alignments. *Genome Biol.* 2014;15(3):R46. Epub 2014/03/04. doi: 10.1186/gb-2014-15-3-  
440 r46. PubMed PMID: 24580807; PubMed Central PMCID: PMC4053813.
- 441 19. Zerbino DR, Birney E. Velvet: algorithms for de novo short read assembly using de Bruijn  
442 graphs. *Genome Res.* 2008;18(5):821-9. doi: 10.1101/gr.074492.107. PubMed PMID: 18349386;  
443 PubMed Central PMCID: PMC2336801.
- 444 20. Page AJ, De Silva N, Hunt M, Quail MA, Parkhill J, Harris SR, et al. Robust high-  
445 throughput prokaryote de novo assembly and improvement pipeline for Illumina data. *Microb*  
446 *Genom.* 2016;2(8):e000083. doi: 10.1099/mgen.0.000083. PubMed PMID: 28348874; PubMed  
447 Central PMCID: PMC5320598.
- 448 21. Seemann T. Prokka: rapid prokaryotic genome annotation. *Bioinformatics.*  
449 2014;30(14):2068-9. doi: 10.1093/bioinformatics/btu153. PubMed PMID: 24642063.
- 450 22. Page AJ, Cummins CA, Hunt M, Wong VK, Reuter S, Holden MT, et al. Roary: rapid large-  
451 scale prokaryote pan genome analysis. *Bioinformatics.* 2015;31(22):3691-3. doi:  
452 10.1093/bioinformatics/btv421. PubMed PMID: 26198102; PubMed Central PMCID:  
453 PMC4817141.
- 454 23. Letunic I, Bork P. Interactive tree of life (iTOL) v3: an online tool for the display and  
455 annotation of phylogenetic and other trees. *Nucleic Acids Res.* 2016;44(W1):W242-5. Epub  
456 2016/04/21. doi: 10.1093/nar/gkw290. PubMed PMID: 27095192; PubMed Central PMCID:  
457 PMC4987883.

- 458 24. Forde BM, Ben Zakour NL, Stanton-Cook M, Phan MD, Totsika M, Peters KM, et al. The  
459 complete genome sequence of *Escherichia coli* EC958: a high quality reference sequence for the  
460 globally disseminated multidrug resistant *E. coli* O25b:H4-ST131 clone. *PLoS One*.  
461 2014;9(8):e104400. Epub 2014/08/16. doi: 10.1371/journal.pone.0104400. PubMed PMID:  
462 25126841; PubMed Central PMCID: PMC4134206.
- 463 25. Moradigaravand D, Boinett CJ, Martin V, Peacock SJ, Parkhill J. Recent independent  
464 emergence of multiple multidrug-resistant *Serratia marcescens* clones within the United  
465 Kingdom and Ireland. *Genome Res*. 2016;26(8):1101-9. Epub 2016/07/20. doi:  
466 10.1101/gr.205245.116. PubMed PMID: 27432456; PubMed Central PMCID: PMC4971767.
- 467 26. Paradis E, Claude J, Strimmer K. APE: Analyses of Phylogenetics and Evolution in R  
468 language. *Bioinformatics*. 2004;20(2):289-90. Epub 2004/01/22. PubMed PMID: 14734327.
- 469 27. Jombart T. adegenet: a R package for the multivariate analysis of genetic markers.  
470 *Bioinformatics*. 2008;24(11):1403-5. doi: 10.1093/bioinformatics/btn129. PubMed PMID:  
471 18397895.
- 472 28. Brynildsrud O, Bohlin J, Scheffer L, Eldholm V. Rapid scoring of genes in microbial pan-  
473 genome-wide association studies with Scoary. *Genome Biol*. 2016;17(1):238. doi:  
474 10.1186/s13059-016-1108-8. PubMed PMID: 27887642; PubMed Central PMCID:  
475 PMC45124306.
- 476 29. Inouye M, Conway TC, Zobel J, Holt KE. Short read sequence typing (SRST): multi-locus  
477 sequence types from short reads. *BMC Genomics*. 2012;13:338. doi: 10.1186/1471-2164-13-  
478 338. PubMed PMID: 22827703; PubMed Central PMCID: PMC3460743.
- 479 30. Moon DC, Seol SY, Gurung M, Jin JS, Choi CH, Kim J, et al. Emergence of a new mutation  
480 and its accumulation in the topoisomerase IV gene confers high levels of resistance to  
481 fluoroquinolones in *Escherichia coli* isolates. *Int J Antimicrob Agents*. 2010;35(1):76-9. Epub  
482 2009/09/29. doi: 10.1016/j.ijantimicag.2009.08.003. PubMed PMID: 19781915.
- 483 31. Jacoby GA. Mechanisms of resistance to quinolones. *Clin Infect Dis*. 2005;41 Suppl  
484 2:S120-6. Epub 2005/06/09. doi: 10.1086/428052. PubMed PMID: 15942878.
- 485 32. Nicolas-Chanoine MH, Bertrand X, Madec JY. *Escherichia coli* ST131, an intriguing clonal  
486 group. *Clin Microbiol Rev*. 2014;27(3):543-74. Epub 2014/07/02. doi: 10.1128/CMR.00125-13.  
487 PubMed PMID: 24982321; PubMed Central PMCID: PMC4135899.
- 488 33. Stephan J, Stegle O, Beyer A. A random forest approach to capture genetic effects in the  
489 presence of population structure. *Nat Commun*. 2015;6:7432. Epub 2015/06/26. doi:  
490 10.1038/ncomms8432. PubMed PMID: 26109276.
- 491 34. Li J, Malley JD, Andrew AS, Karagas MR, Moore JH. Detecting gene-gene interactions  
492 using a permutation-based random forest method. *BioData Min*. 2016;9:14. Epub 2016/04/08.  
493 doi: 10.1186/s13040-016-0093-5. PubMed PMID: 27053949; PubMed Central PMCID:  
494 PMC4822295.
- 495 35. Lees JA, Vehkala M, Valimaki N, Harris SR, Chewapreecha C, Croucher NJ, et al.  
496 Sequence element enrichment analysis to determine the genetic basis of bacterial phenotypes.  
497 *Nat Commun*. 2016;7:12797. Epub 2016/09/17. doi: 10.1038/ncomms12797. PubMed PMID:  
498 27633831; PubMed Central PMCID: PMC45028413.
- 499 36. Pedregosa *et al.*, *Scikit-learn: Machine Learning in Python*, *JMLR* 12, pp. 2825-2830,  
500 2011

501 37. William Jones, Kaur Alasoo, Dmytro Fishman, Leopold Parts, Computational biology:  
502 deep learning, DOI: 10.1042/ETLS20160025, Emerging Topics in Life Sciences

503  
504

### 505 **Author Contributions**

506

507 DM and LP designed the study framework. DM developed and implemented the model. LP, VM  
508 and JW supervised the project. MP and AF generated data. All authors read and approved the  
509 final manuscript. The authors have declared that no competing interests exist.

510

511

512

### 513 **Funding information**

514 This work was partially funded by a grant from the Centre for Antibiotic Resistance Research  
515 (CARE) at the University of Gothenburg to AF and grant number 2016-06503 from the Joint  
516 Programming Initiative on Antimicrobial Resistance (JPIAMR) to JW and AF. This work was in part  
517 supported by the Academy of Finland (grant 313270 to VM). LP was supported by Wellcome, and  
518 Estonian Research Council (IUT34-4). DM was supported by the Joint Programming Initiative on  
519 Antimicrobial Resistance (JPIAMR) via MRC grant MR/R004501/1. The funders had no role in  
520 study design, data collection and analysis, decision to publish, or preparation of the manuscript.

521

522

523

### 524 **Acknowledgements**

525 Christina Åhrén, Nahid Karami, Carl-Fredrik Flach, Ed Moore (Culture Collection University of  
526 Gothenburg, CCUG), Jan Michiels and Marco Galardini are gratefully acknowledged for providing  
527 strains. Daniel Jaén Luchoro, Fabrice E. Graf, Owens Uwangué and Viktor Garellick are gratefully  
528 acknowledged for technical assistance and helpful discussions.

## 529 **Figures**

530

531

532 **Figure 1. Prediction performance of the best tuned models.** F1 score (harmonic mean of  
533 precision and recall; y-axis) for resistant (top panel) and susceptible (middle panel) phenotypes  
534 for four predictive models (red: gradient boosted decision trees; green: logistic regression; teal:  
535 random forests; purple: deep learning) across eleven antibiotics (x-axis). The best model of each  
536 class for every drug (x-axis) was identified based on the F1 score for resistance and employed a  
537 number of possible combinations of gene presence, population structure, and year of isolation  
538 (lower panel; black: feature used; white: feature not used).

539

540

541

542

543

544

545

546

547

548 **Figure 2 Population structure and phenotypic distribution of the input data.** A) Phylogenetic  
549 distribution of clusters identified in the population for SNP distance cut-off values of 2, 143, 5054  
550 and 14489 (outer circles) relative to the phylogenetic tree. B) Phylogenetic distribution of correct  
551 calls (true positives, true negatives) and errors (false positives, false negatives) when predicting  
552 cephalothin (CET) resistance with the best performing gradient boosted model. The F1 score for  
553 resistance was 0.81. C) Phylogenetic distribution of the most important identified population  
554 structure feature, clustering with SNP cut-off of 136 (outer ring), compared with the phylogenetic  
555 distribution of resistance phenotype (inner ring; blue: susceptible; red: resistant).

556 **Table 1.** Prediction metrics on held out data for the best performing gradient boosted decision  
557 trees model. TN: true negatives, FN: false negatives, FP: false positives, TP: true positives, PRC:  
558 precision, RCL: recall, S: susceptibility, R: resistance.  
559  
560

|     | TN  | FP | FN | TP  | PRC  | S    | PRC  | R    | RCL  | S    | RCL | R | FSc | S | FSc | R |
|-----|-----|----|----|-----|------|------|------|------|------|------|-----|---|-----|---|-----|---|
| CTZ | 478 | 7  | 15 | 66  | 0.96 | 0.9  | 0.98 | 0.81 | 0.97 | 0.86 |     |   |     |   |     |   |
| CTX | 438 | 0  | 10 | 98  | 0.98 | 1    | 1    | 0.9  | 0.99 | 0.95 |     |   |     |   |     |   |
| AMP | 58  | 9  | 6  | 163 | 0.9  | 0.95 | 0.87 | 0.97 | 0.88 | 0.96 |     |   |     |   |     |   |
| AMX | 131 | 7  | 18 | 173 | 0.88 | 0.96 | 0.95 | 0.9  | 0.91 | 0.93 |     |   |     |   |     |   |
| AMC | 313 | 35 | 61 | 95  | 0.84 | 0.73 | 0.9  | 0.6  | 0.87 | 0.66 |     |   |     |   |     |   |
| CXM | 405 | 8  | 50 | 100 | 0.89 | 0.93 | 0.98 | 0.66 | 0.93 | 0.77 |     |   |     |   |     |   |
| CET | 127 | 3  | 12 | 91  | 0.91 | 0.97 | 0.98 | 0.88 | 0.94 | 0.92 |     |   |     |   |     |   |
| GEN | 482 | 3  | 10 | 69  | 0.98 | 0.96 | 0.99 | 0.87 | 0.99 | 0.91 |     |   |     |   |     |   |
| TBM | 172 | 3  | 10 | 50  | 0.94 | 0.94 | 0.98 | 0.83 | 0.96 | 0.88 |     |   |     |   |     |   |
| TMP | 143 | 4  | 8  | 98  | 0.95 | 0.96 | 0.97 | 0.92 | 0.96 | 0.94 |     |   |     |   |     |   |
| CIP | 445 | 6  | 24 | 106 | 0.95 | 0.95 | 0.99 | 0.81 | 0.97 | 0.88 |     |   |     |   |     |   |

561  
562 **Table 2.** Comparison of prediction results with a rule-based model, srst2. True positives (TP), false  
563 positives (FP) and false negatives (FN) from Table 1. Resistant genes were identified by srst2 using  
564 the Resfinder database. Since ciprofloxacin resistance is caused by chromosomal mutations, we  
565 have not included this antibiotic in the table.

| Drug | TP without resistant gene | FN without resistant gene | FP with resistant gene |
|------|---------------------------|---------------------------|------------------------|
| CTZ  | 3/66                      | 1/15                      | 7/7                    |
| CTX  | 2/98                      | 4/10                      | -                      |
| AMP  | 9/163                     | 1/6                       | 2/9                    |
| AMX  | 8/173                     | 0/18                      | 5/7                    |
| AMC  | 0/95                      | 1/61                      | 33/35                  |
| CXM  | 3/100                     | 4/50                      | 6/8                    |
| CET  | 6/91                      | 7/12                      | 3/3                    |
| GEN  | 7/69                      | 9/10                      | 2/3                    |
| TBM  | 7/50                      | 2/10                      | 3/3                    |
| TMP  | 6/98                      | 7/8                       | 1/4                    |

566

## 567 **Supplemental Tables**

568 **Supplemental Table S1: list of isolates with associated metadata and accession numbers in the**  
569 **European Nucleotide Archive (ENA).**

570 **Supplemental Table S2: List of important accessory genes and their functions for feature**  
571 **importance analysis with the best performing gradient boosted decision trees models shown**  
572 **in Figure S4. The importance metrics include the number of runs (total 50 runs), in which the**  
573 **feature was used during model optimization and the average ranking and importance for the**  
574 **feature in these runs.**

**A**

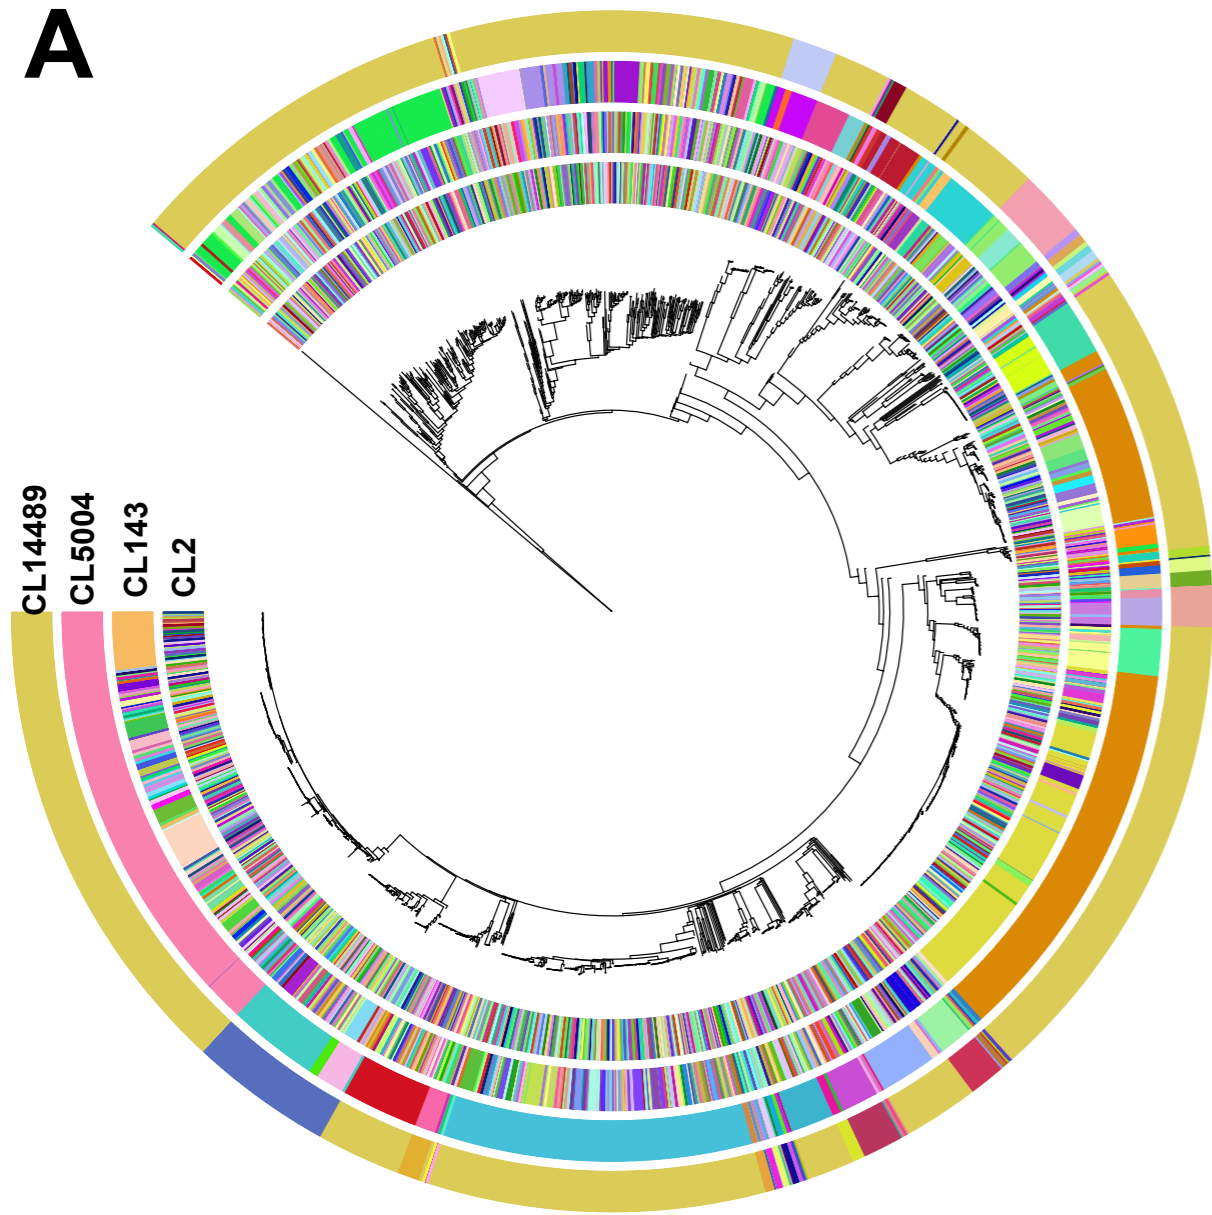

**B**

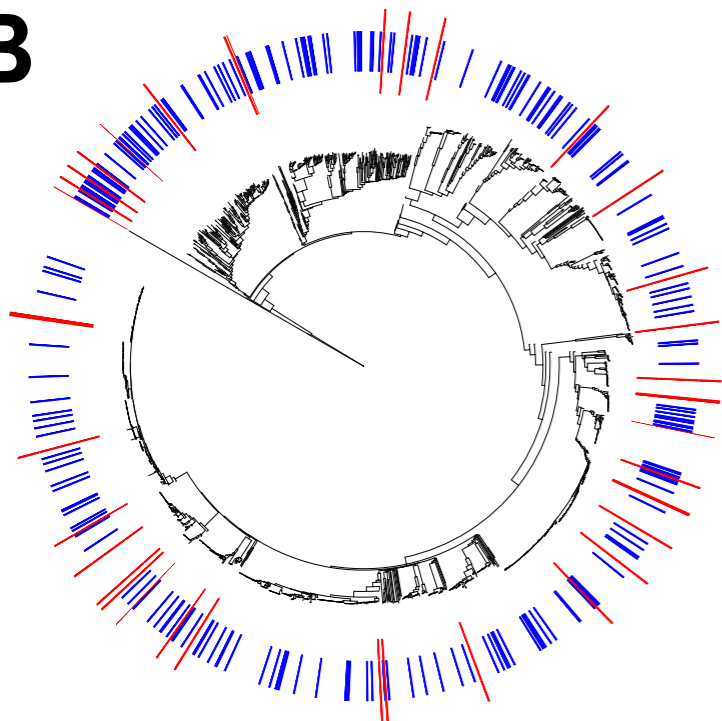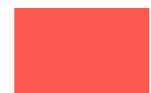

Error (false positive or false negative)

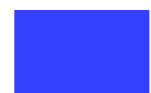

Correct (true positive or true negative)

**CET Key**

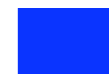

Susceptible

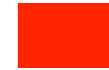

Resistant

**C**

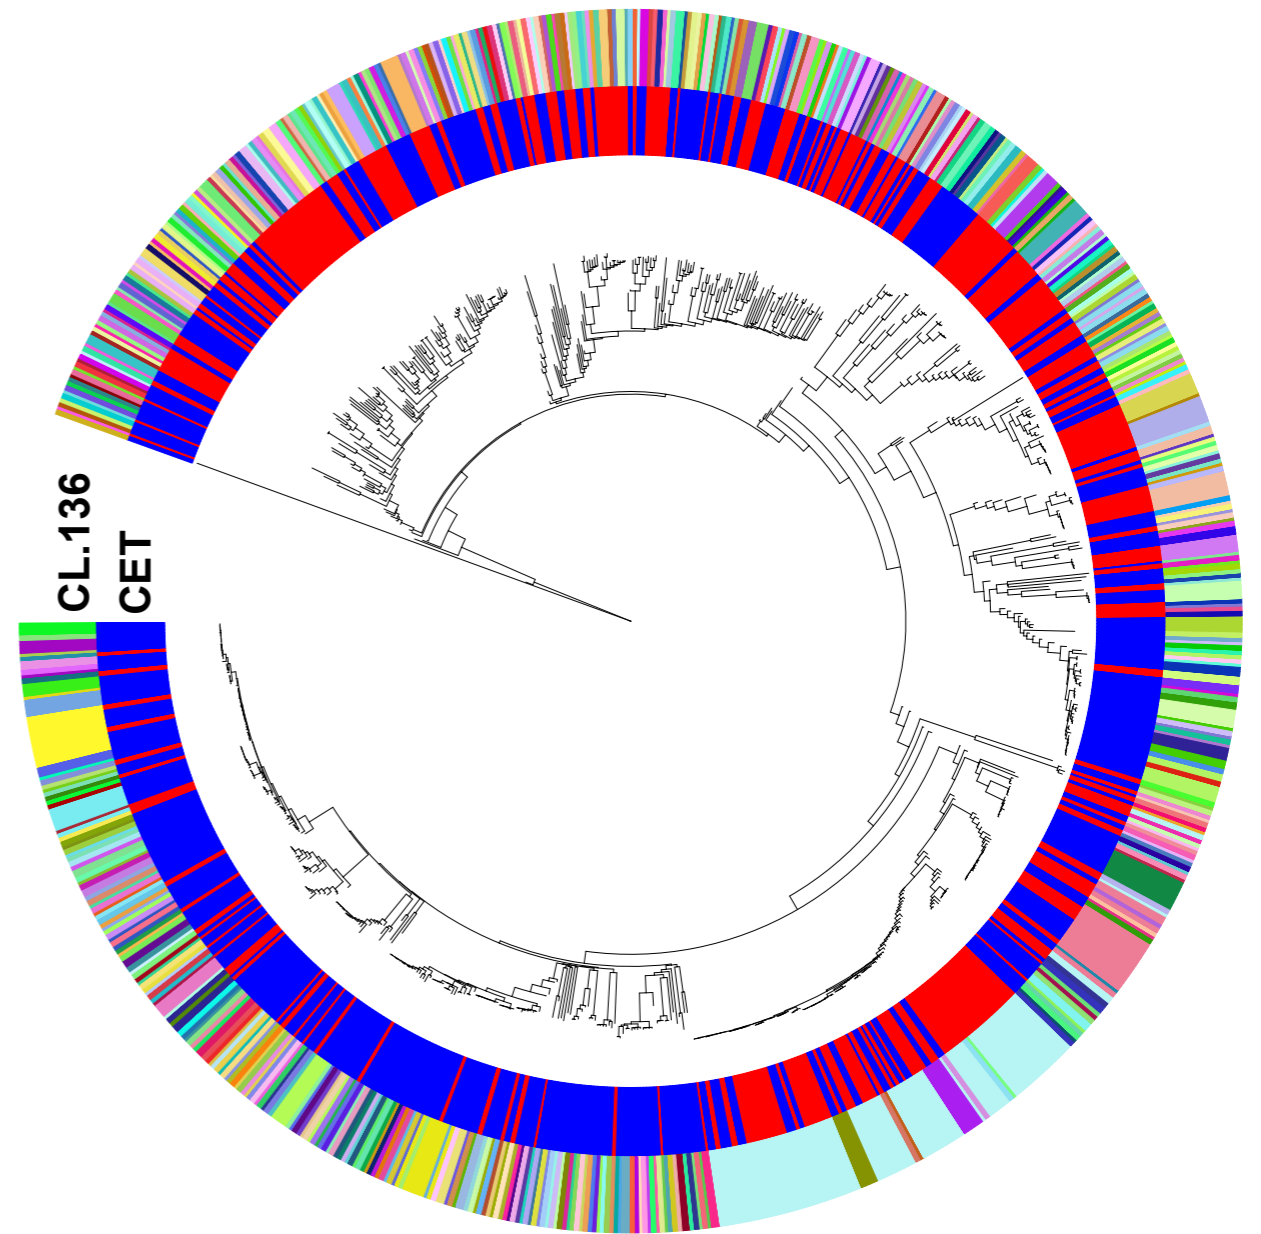

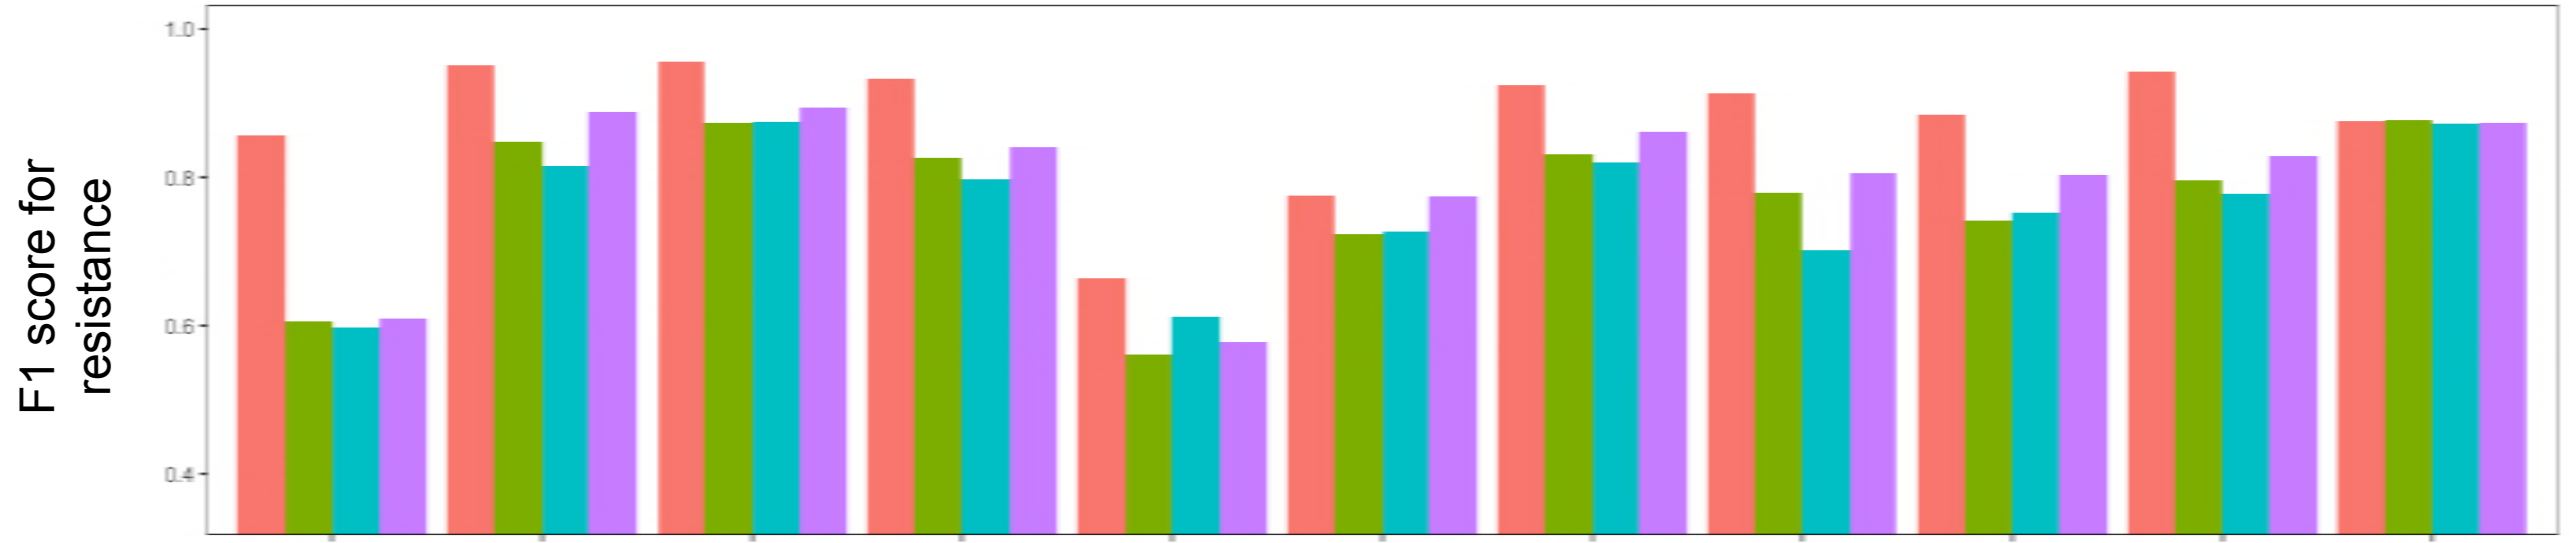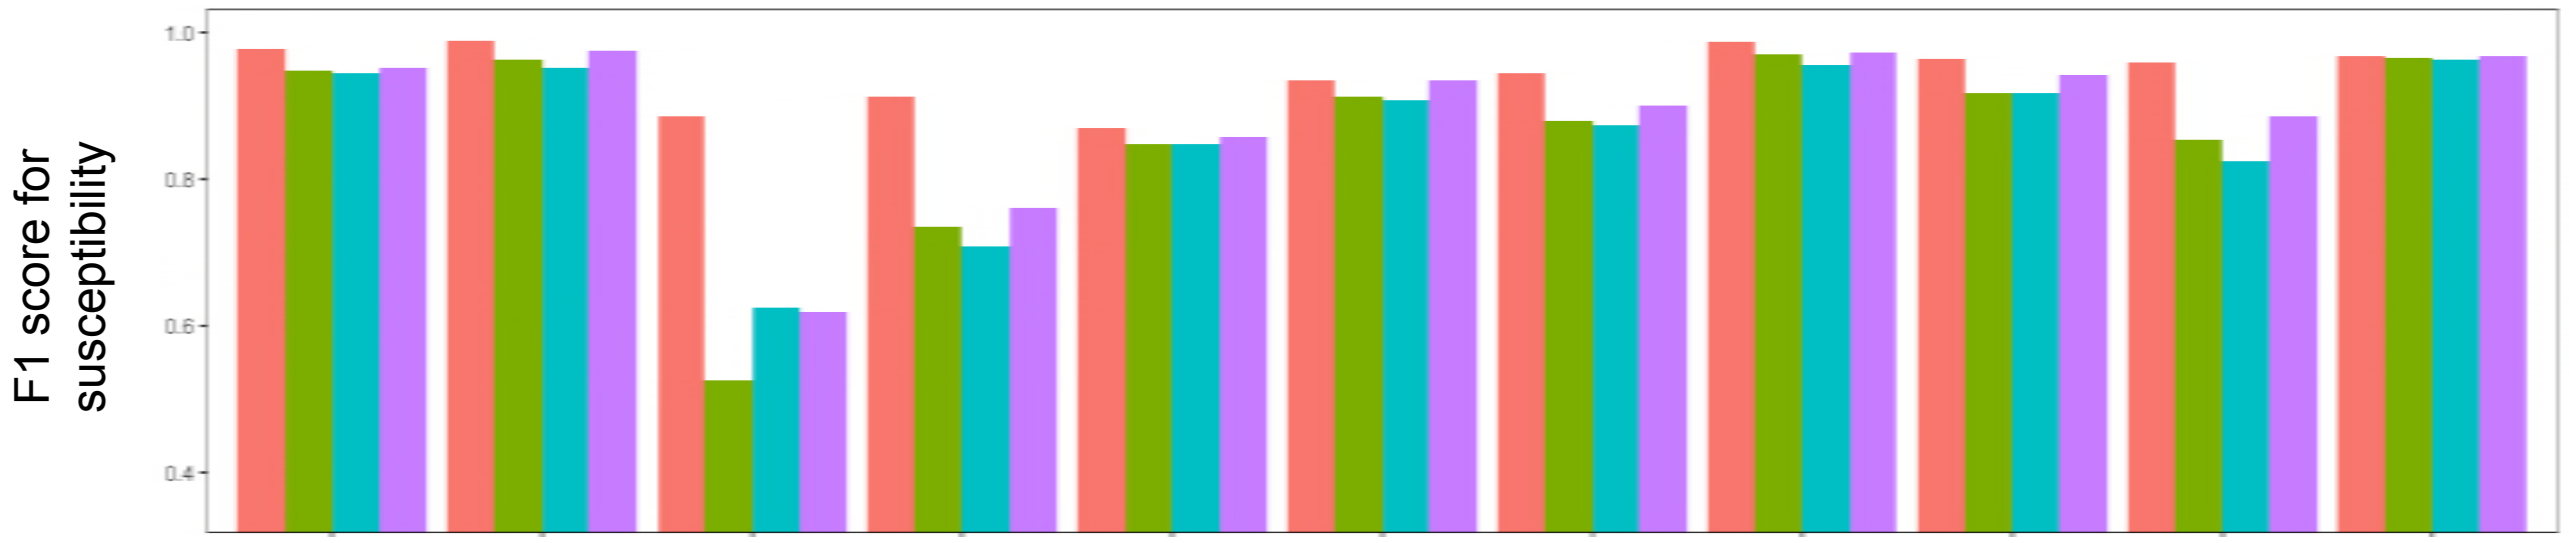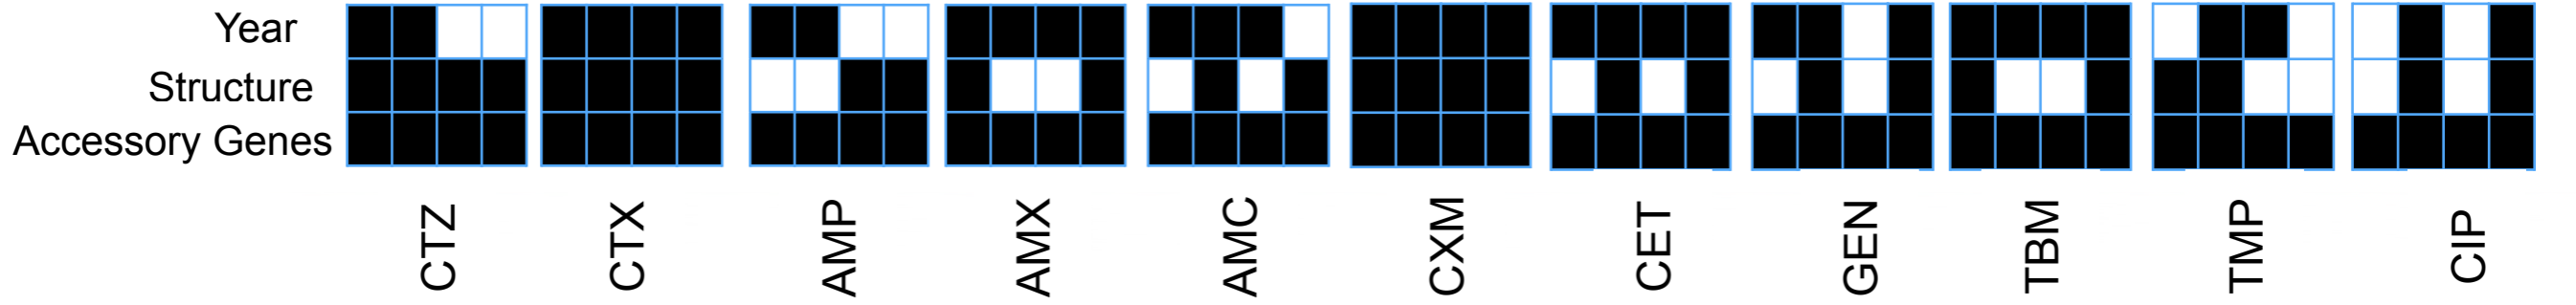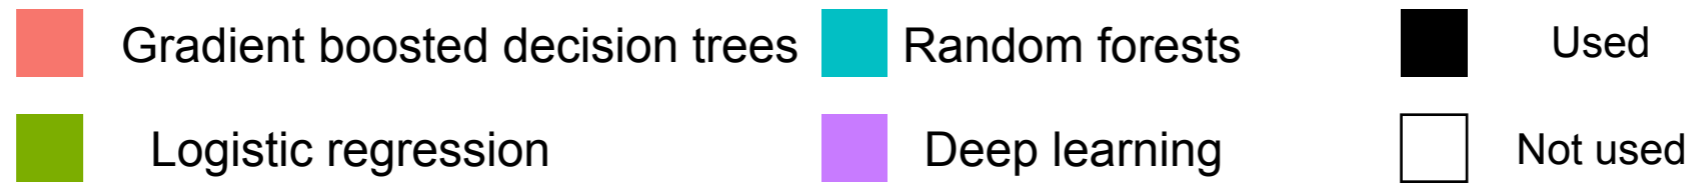

Source: https://www.biorxiv.org/content/10.1101/338194v1.full.pdf
